# Supplementary material for: Tuning the electrochemiluminescent properties of iridium complexes of N-heterocyclic carbene ligands
Source: Royal Society of Chemistry journal article supplement (doi:10.1039/c8dt04433c), 2018-12-05
Supplement: c8dt04433c1.pdf [file c8dt04433c1.pdf]

Supplementary Information for:

## **Tuning the Electrochemiluminescent properties of Iridium Complexes of N-Heterocyclic Carbene Ligands**

Linh M. Quan, Bradley D. Stringer, Mohammad A. Haghighatbin, Johnny Agugiaro, Gregory J. Barbante, David D. J. Wilson, Conor F. Hogan\* and Peter J. Barnard\*

*Department of Chemistry and Physics, La Trobe Institute for Molecular Science, La Trobe University, Victoria, 3086, Australia, E-mail: c.hogan@latrobe.edu.au and p.barnard@latrobe.edu.au*

### **X ray crystallography**

X-ray Crystallography. Single crystals of the Ir(III) complexes **1**, **3**, **5**, and **6** suitable for X-ray diffraction studies were grown by slow diffusion of ethyl acetate into acetonitrile solutions of each compound at ambient temperature. Crystallographic data for all structures determined are given in Tables 1 and S1. For all samples, crystals were removed from the crystallisation vial and immediately coated with paratone oil on a glass slide. A suitable crystal was mounted in Paratone oil on a glass fibre and cooled rapidly to 173 K in a stream of cold N<sub>2</sub> using an Oxford low temperature device. Diffraction data were measured using an Oxford Gemini diffractometer mounted with Mo-K $\alpha$   $\lambda$  = 0.71073 Å and Cu-K $\alpha$   $\lambda$  = 1.54184. Data were reduced and corrected for absorption using the CrysAlis Pro program. The SHELXL2013-2 program was used to solve the structures with Direct Methods, with refinement by the Full-Matrix Least-Squares refinement techniques on F<sup>2</sup>. The non-hydrogen atoms were refined anisotropically and hydrogen atoms were placed geometrically and refined using the riding model. Coordinates and anisotropic thermal parameters of all non-hydrogen atoms were refined. All calculations were carried out using the program Olex2. Images were generated by using ORTEP-3. Further XRD details are provided in the Supporting Information. CCDC 1869253-1869256 contains the supplementary crystallographic data for this paper. These data can be obtained free of charge from The Cambridge Crystallographic Data Centre via [www.ccdc.cam.ac.uk/data\\_request/cif](http://www.ccdc.cam.ac.uk/data_request/cif).

Table S1. Crystallographic data for all structures **1**, **2**, **5**, and **6**.

| Compound                                              | <b>1</b>                                                         | <b>3</b>                                                                       | <b>5</b>                                                         | <b>6</b>                                                           |
|-------------------------------------------------------|------------------------------------------------------------------|--------------------------------------------------------------------------------|------------------------------------------------------------------|--------------------------------------------------------------------|
| Empirical formula                                     | C <sub>34</sub> H <sub>24</sub> N <sub>5</sub> F <sub>4</sub> Ir | C <sub>34</sub> H <sub>25</sub> F <sub>4</sub> IrN <sub>4</sub> O <sub>2</sub> | C <sub>32</sub> H <sub>19</sub> N <sub>4</sub> F <sub>6</sub> Ir | C <sub>36</sub> H <sub>29</sub> N <sub>5</sub> F <sub>4</sub> IrCl |
| Formula weight                                        | 770.78                                                           | 789.78                                                                         | 765.71                                                           | 835.29                                                             |
| Temperature/K                                         | 173                                                              | 173                                                                            | 173                                                              | 173                                                                |
| Crystal system                                        | triclinic                                                        | triclinic                                                                      | monoclinic                                                       | triclinic                                                          |
| Space group                                           | <i>P</i> -1                                                      | <i>P</i> -1                                                                    | <i>P</i> 2 <sub>1</sub> / <i>n</i>                               | <i>P</i> -1                                                        |
| <i>a</i> /Å                                           | 9.8986(3)                                                        | 10.3830(3)                                                                     | 10.84307(11)                                                     | 9.0031(3)                                                          |
| <i>b</i> /Å                                           | 11.6908(4)                                                       | 10.6683(3)                                                                     | 15.66542(16)                                                     | 12.7459(4)                                                         |
| <i>c</i> /Å                                           | 13.1739(4)                                                       | 13.4176(4)                                                                     | 15.57142(16)                                                     | 15.4060(5)                                                         |
| $\alpha$ /°                                           | 71.971(3)                                                        | 76.274(2)                                                                      | 90                                                               | 104.264(3)                                                         |
| $\beta$ /°                                            | 89.258(2)                                                        | 82.985(2)                                                                      | 92.5122(9)                                                       | 105.973(3)                                                         |
| $\gamma$ /°                                           | 88.706(3)                                                        | 84.990(2)                                                                      | 90                                                               | 98.494(2)                                                          |
| Volume/Å <sup>3</sup>                                 | 1449.28(8)                                                       | 1430.37(7)                                                                     | 2642.44(5)                                                       | 1602.56(9)                                                         |
| <i>Z</i>                                              | 2                                                                | 2                                                                              | 4                                                                | 2                                                                  |
| $\rho$ calc/mg/mm <sup>3</sup>                        | 1.766                                                            | 1.834                                                                          | 1.925                                                            | 1.731                                                              |
| $\mu$ /mm <sup>-1</sup>                               | 9.429                                                            | 4.734                                                                          | 10.44                                                            | 4.307                                                              |
| F(000)                                                | 752                                                              | 772                                                                            | 1480                                                             | 820                                                                |
| Crystal size/mm <sup>3</sup>                          | 0.15 × 0.15 × 0.04                                               | 0.08 × 0.04 × 0.04                                                             | 0.1 × 0.08 × 0.05                                                | 0.1 × 0.05 × 0.05                                                  |
| Radiation                                             | CuK $\alpha$ ( $\lambda$ = 1.54184)                              | MoK $\alpha$ ( $\lambda$ = 0.71073)                                            | CuK $\alpha$ ( $\lambda$ = 1.54184)                              | MoK $\alpha$ ( $\lambda$ = 0.71073)                                |
| 2 $\theta$ range for data collection                  | 7.056 to 147.464°                                                | 6.286 to 52.74<br>-12 ≤ <i>h</i> ≤ 11, -13                                     | 8.01 to 147.702°                                                 | 5.77 to 52.738°                                                    |
| Index ranges                                          | -12 ≤ <i>h</i> ≤ 12, -14 ≤<br><i>k</i> ≤ 13, -16 ≤ <i>l</i> ≤ 11 | ≤ <i>k</i> ≤ 13, -16 ≤ <i>l</i> ≤ 16                                           | -8 ≤ <i>h</i> ≤ 13, -19 ≤ <i>k</i> ≤ 18, -19 ≤ <i>l</i> ≤ 19     | -11 ≤ <i>h</i> ≤ 11, -15 ≤<br><i>k</i> ≤ 15, -19 ≤ <i>l</i> ≤ 19   |
| Reflections collected                                 | 9129                                                             | 11588<br>5844 [R <sub>int</sub> =                                              | 17700                                                            | 14873                                                              |
| Independent reflections                               | 5672 [R <sub>int</sub> = 0.0346,<br>R <sub>sigma</sub> = 0.0290] | 0.0181, R <sub>sigma</sub> =<br>0.0280]                                        | 5281 [R <sub>int</sub> = 0.0209,<br>R <sub>sigma</sub> = 0.0172] | 6542 [R <sub>int</sub> = 0.0255,<br>R <sub>sigma</sub> = 0.0347]   |
| Data/restraints/parameters                            | 5672/0/399                                                       | 5844/0/409                                                                     | 5281/0/389                                                       | 6542/0/428                                                         |
| Goodness-of-fit on F <sup>2</sup>                     | 1.054                                                            | 1.075                                                                          | 1.16                                                             | 1.043                                                              |
| Final R indexes [ <i>I</i> ≥ 2 $\sigma$ ( <i>I</i> )] | R <sub>1</sub> = 0.0473, wR <sub>2</sub> =<br>0.1270             | R <sub>1</sub> = 0.0204, wR <sub>2</sub> =<br>= 0.0498                         | R <sub>1</sub> = 0.0205, wR <sub>2</sub> =<br>0.0506             | R <sub>1</sub> = 0.0209, wR <sub>2</sub> =<br>0.0473               |
| Final R indexes [all data]                            | R <sub>1</sub> = 0.0480, wR <sub>2</sub> =<br>0.1279             | R <sub>1</sub> = 0.0233, wR <sub>2</sub> =<br>= 0.0515                         | R <sub>1</sub> = 0.0212, wR <sub>2</sub> =<br>0.0509             | R <sub>1</sub> = 0.0244, wR <sub>2</sub> =<br>0.0492               |
| Largest diff. peak/hole / e Å <sup>-3</sup>           | 3.29/-2.19                                                       | 0.89/-0.82                                                                     | 0.74/-1.13                                                       | 0.85/-0.71                                                         |

**Details:**

**1:** Solved using direct methods in the triclinic space group *P*-1. The asymmetric unit contains one molecule of the title compound.

**3:** Solved using direct methods in the triclinic space group *P*-1. The asymmetric unit contains one molecule of the title compound. Disorder was identified in the positions of fluorine atoms: F1 and F3. Attempts to model this disorder using two different closely spaced positions for each of these F atoms were unsatisfactory with the site occupancy for one component refining to unreasonably low levels. As a result, disorder in the positions of these atoms was not modelled. Three level B Checkcif alerts result from the disorder associated with these F atoms: Hirshfeld Test Diff for F1 - C12 ..10.7 su, Hirshfeld Test Diff for F3 - C23 .. 9.0 su and Short Inter HL..HL Contact F1 .. F3 . 2.42 Ang.

**5:** Solved using direct methods in the monoclinic space group  $P2_1/n$ . The asymmetric unit contains one molecule of the title compound.

**6:** Solved using direct methods in the triclinic space group  $P-1$ . The asymmetric unit contains one molecule of the title compound and one molecule of acetonitrile as a solvent of crystallisation.

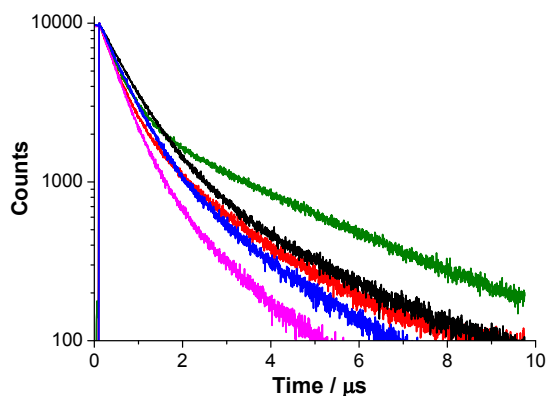

**Figure S1.** Photoluminescence decay profiles for dilute solutions of complexes 1 (red) 2 (green) 3 (black) 4 (pink) and 5 (blue) in de-aerated acetonitrile

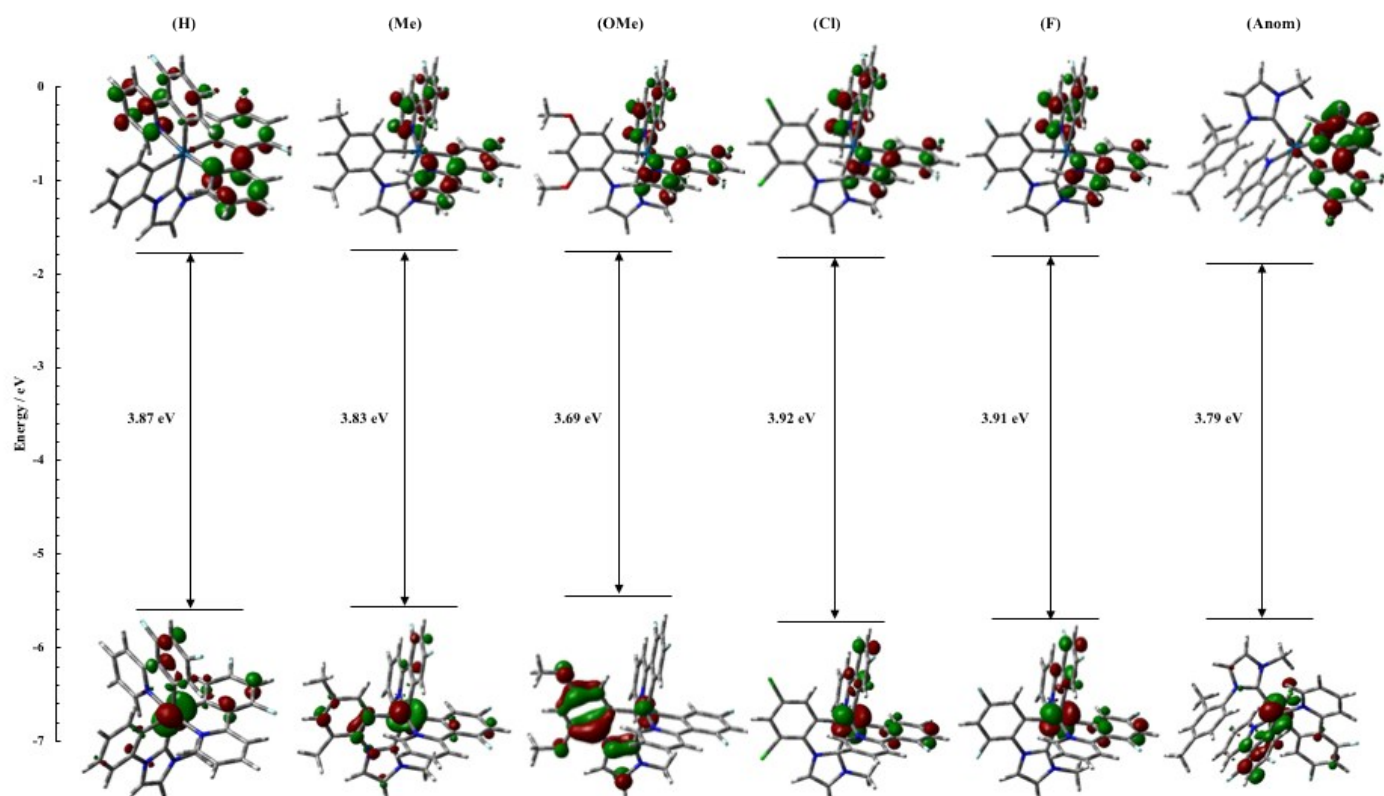

**Figure S2.** B3LYP/def2-TZVP//B3LYP/def2-SVP calculated molecular orbital energy HOMO-LUMO gaps and surface plots of the HOMO and LUMO for compounds 1-5. Acetonitrile solvent correction included with single-point SCRF. Units of eV.

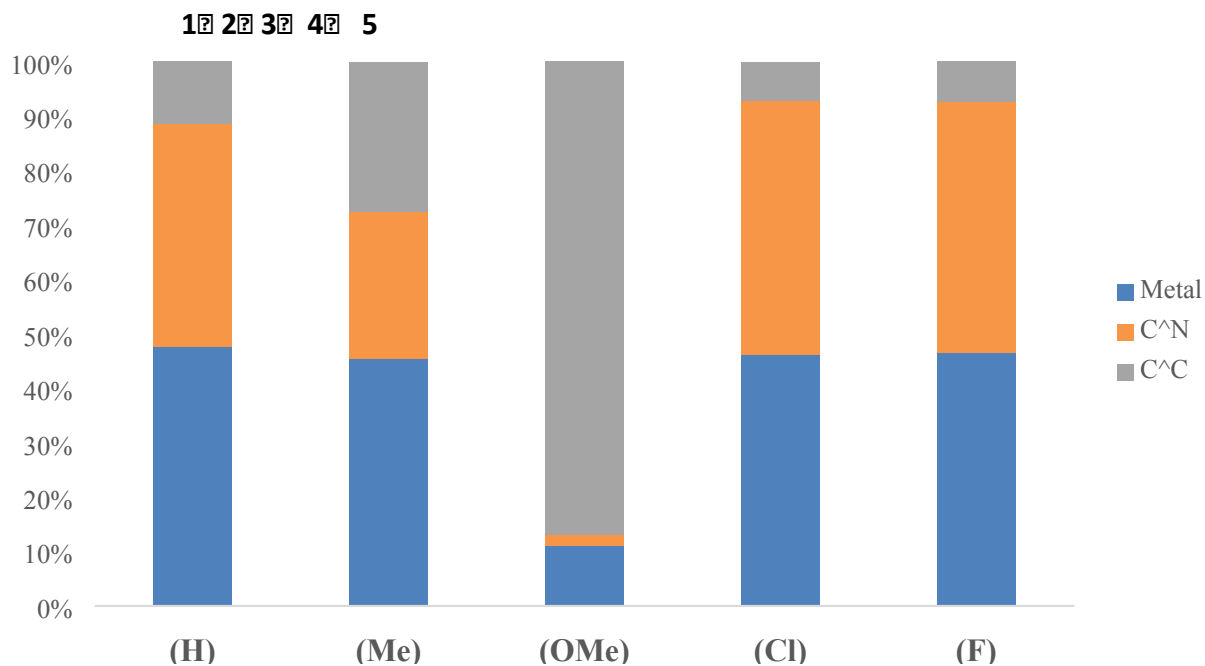

**Figure S3.** Percentage contribution to the HOMO from the metal centre and ligands (C<sup>C</sup> and C<sup>N</sup> ligands) of complexes 1-5 (B3LYP/def2-TZVP calculations).

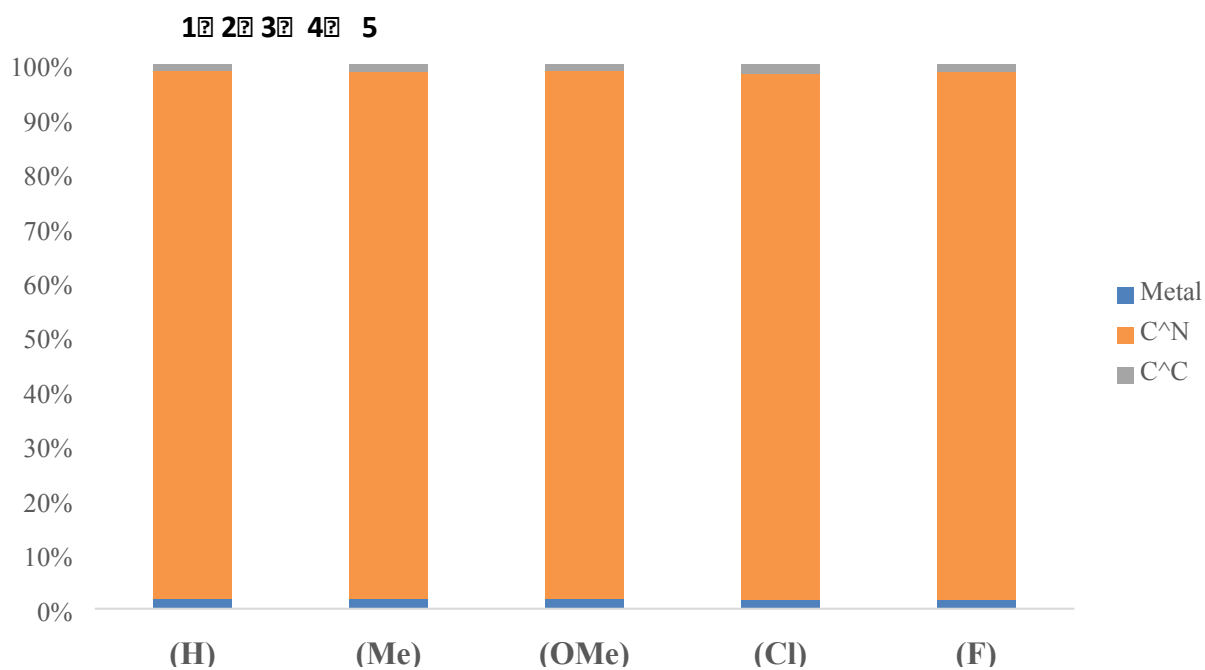

**Figure S4.** Percentage contribution to the LUMO from the metal centre and ligands (C<sup>C</sup> and C<sup>N</sup> ligands) of complexes 1-5 (B3LYP/def2-TZVP calculations).
